# Supplementary material for: Graphene oxide as a nano-platform for ATP detection based on aptamer chemistry
Source: Royal Society of Chemistry journal article supplement (doi:10.1039/c2ay25166c), 2012-01-01
Supplement: c2ay25166c.pdf [file c2ay25166c.pdf]

## Electronic Supplementary Information

# Graphene oxide as a nano-platform for ATP detection based on aptamer chemistry

Wen Dan Pu,<sup>a</sup> Li Zhang<sup>a b</sup> and Cheng Zhi Huang<sup>\*a c</sup>

<sup>a</sup>Education Ministry Key Laboratory on Luminescence and Real-Time Analysis, College of Chemistry and Chemical Engineering, Southwest University, Chongqing 400715, China

<sup>b</sup>Department of Chemistry, Nanchang University, Nanchang 330031, China

<sup>c</sup>College of Pharmaceutical Sciences, Southwest University, Chongqing 400715, China

Fax: +86-23-68866796; Tel: +86-23-68254659; E-mail: chengzhi@swu.edu.cn (C. Z. Huang)

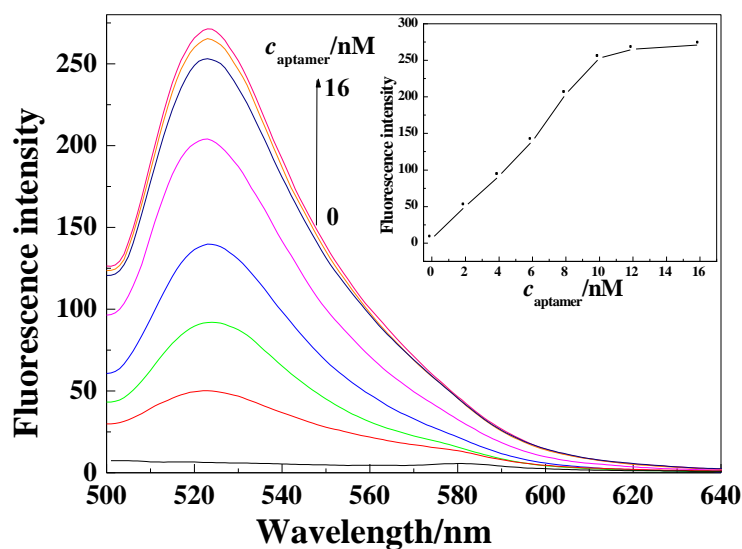

**Fig. S1** Effect of different concentrations of aptamer on the fluorescence intensity of FAM-DNA in the presence of GO. Inset: fluorescence intensity versus concentration of aptamer. Concentrations: FAM-DNA, 10 nM; NaCl, 30 mM; GO, 8.2  $\mu\text{g mL}^{-1}$ ; Tris-HCl (pH 7.4).

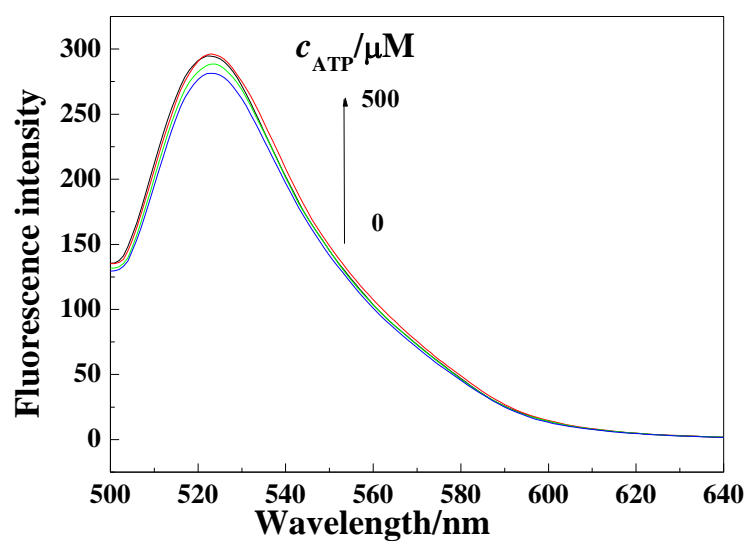

**Fig. S2** Fluorescence emission spectra of FAM-DNA in the presence of different concentrations of ATP. Concentrations: FAM-DNA, 10 nM; NaCl, 30 mM; Tris-HCl (pH 7.4).

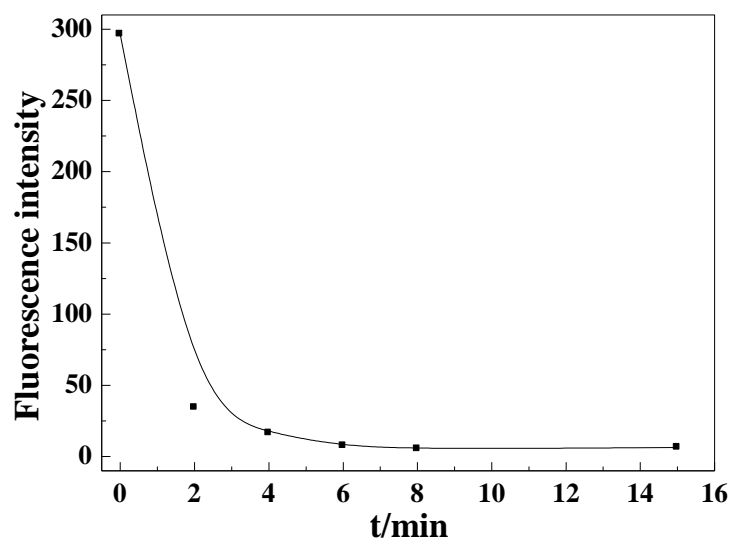

**Fig. S3** Fluorescence quenching of FAM-DNA by GO as a function of time. Concentrations: FAM-DNA, 10 nM; NaCl, 30 mM; GO,  $8.2 \mu\text{g mL}^{-1}$ . Tris-HCl (pH 7.4).
